# Supplementary material for: Biochemical and neurophysiological effects of deficiency of the mitochondrial import protein TIMM50
Source: eLife journal article supplement (doi:10.7554/elife.99914), 2024-08-29

# TIMM50

(The running order is H.C / P1 / P2)

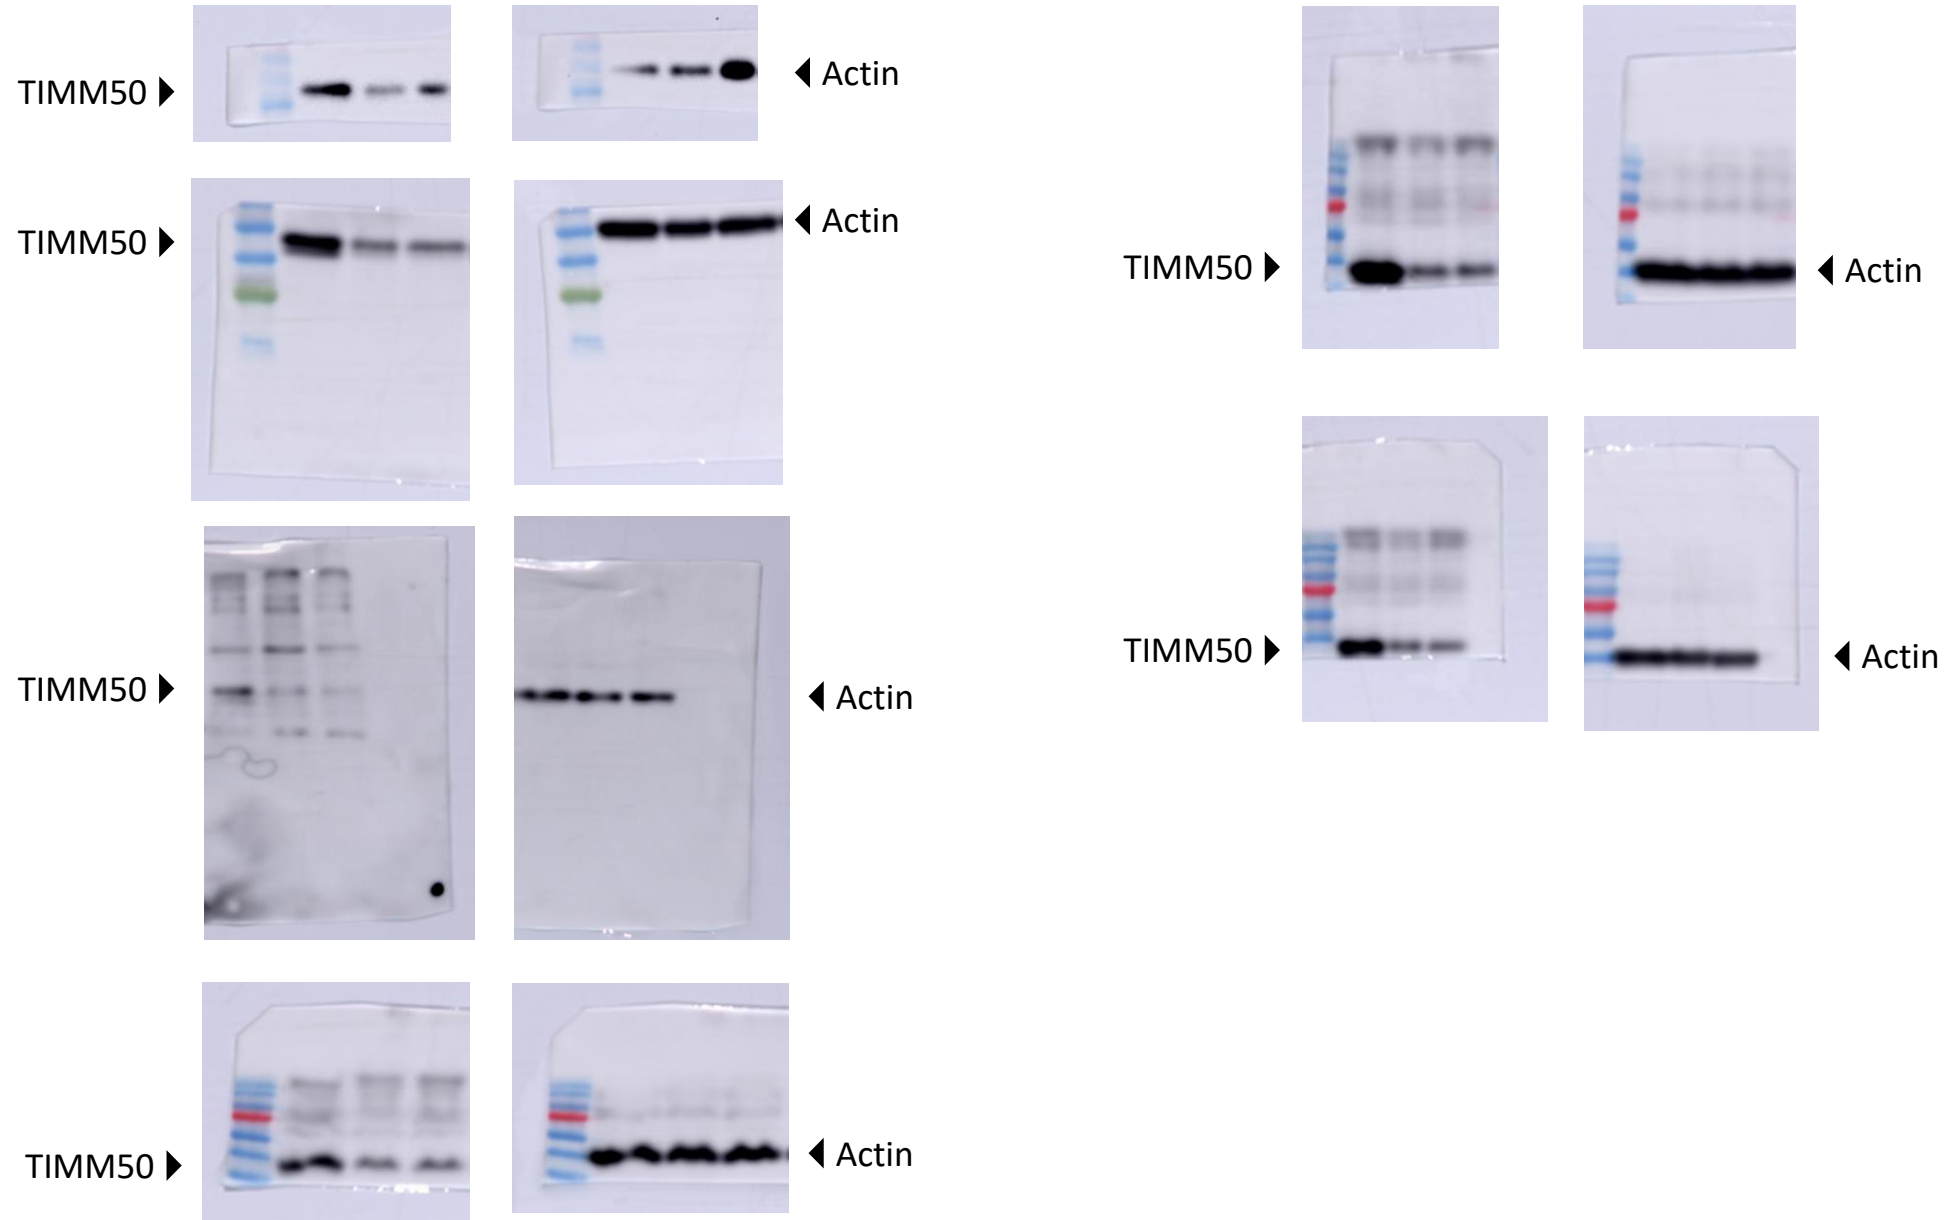

# TIMM23

(The running order is H.C / P1 / P2)

TIMM23 ▶

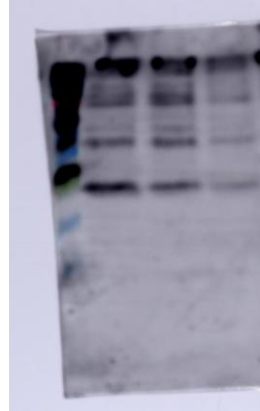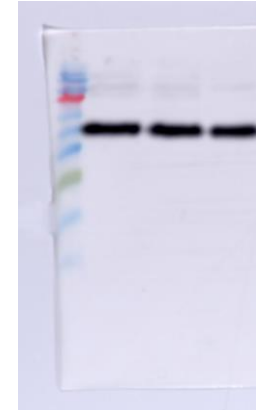

◀ Actin

TIMM23 ▶

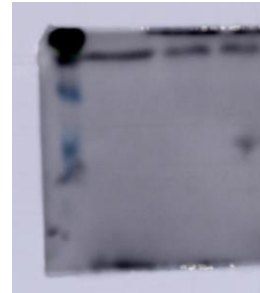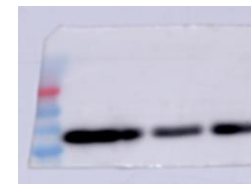

◀ GAPDH

TIMM23 ▶

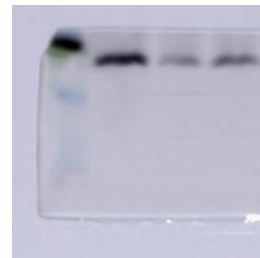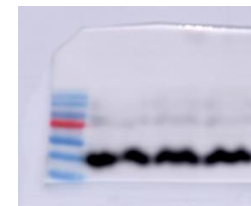

◀ Actin

# TIMM17A

(The running order is H.C / P1 / P2)

TIMM17A ▶

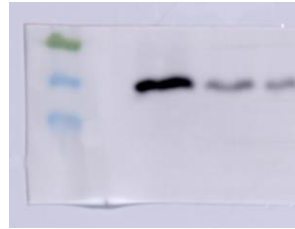

◀ Actin

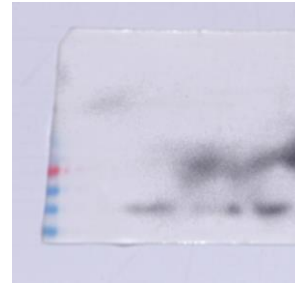

TIMM17A ▶

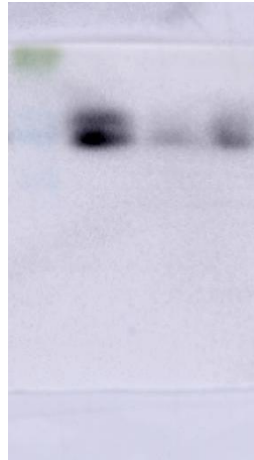

◀ Actin

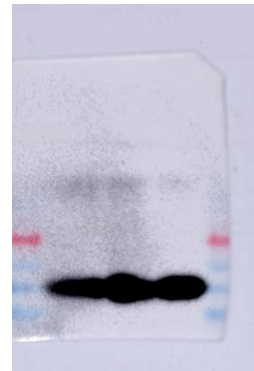

TIMM17A ▶

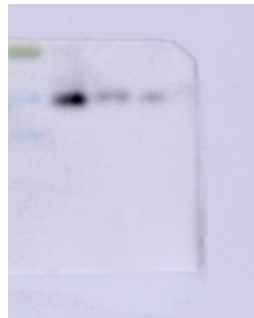

◀ Actin

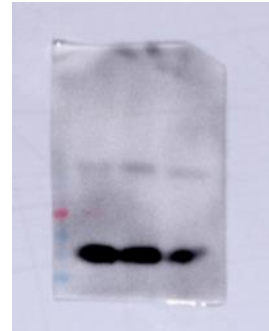

# TIMM17B

(The running order is H.C / P1 / P2)

TIMM17B ▶

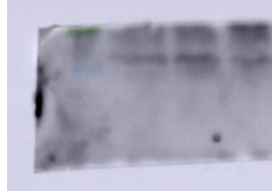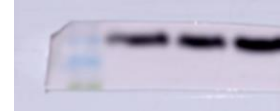

◀ Actin

TIMM17B ▶

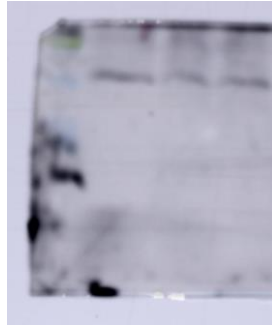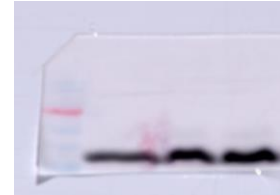

◀ GAPDH

TIMM17B ▶

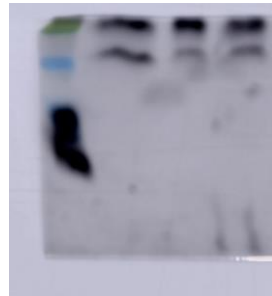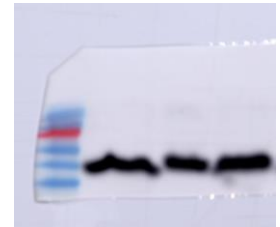

◀ Actin

# TIMM21

(The running order is H.C / P1 / P2)

Unspecific band ▶

TIMM21 ▶

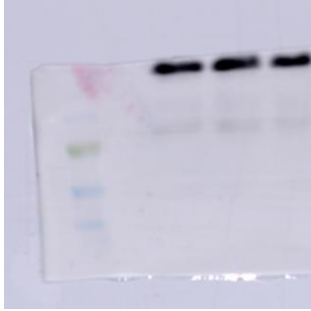

◀ Actin

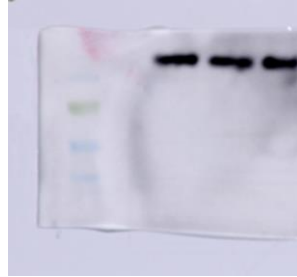

TIMM21 ▶

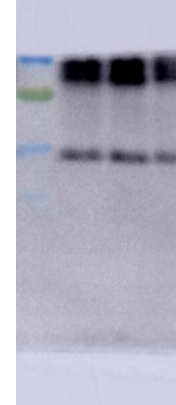

◀ Actin

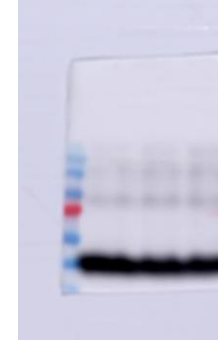

TIMM21 ▶

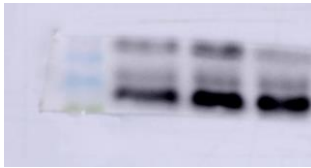

◀ Actin

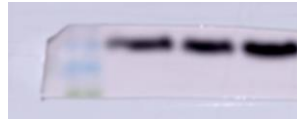

TIMM21 ▶

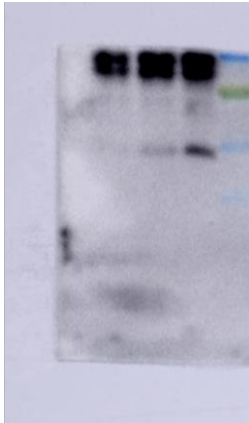

◀ Actin

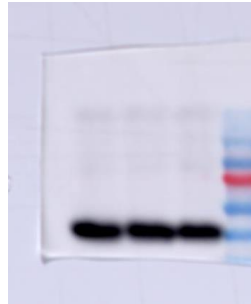

# TIMM44

(The running order is H.C / P1 / P2)

TIMM44 ▶

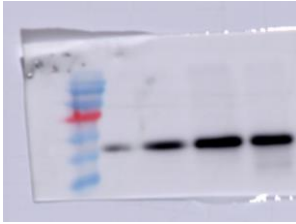

◀ Actin

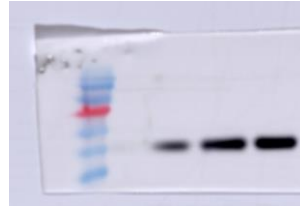

TIMM44 ▶

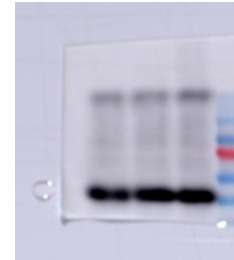

◀ Actin

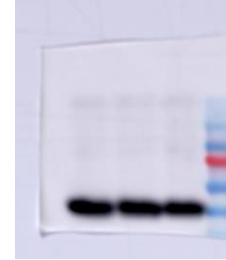

TIMM44 ▶

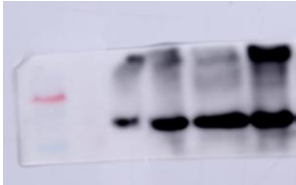

◀ Actin

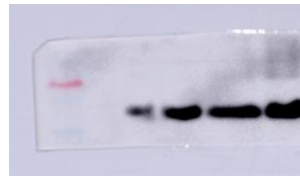

TIMM44 ▶

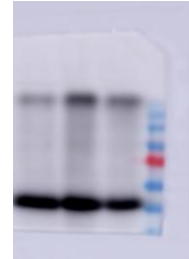

◀ Actin

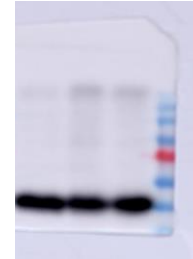

TIMM44 ▶

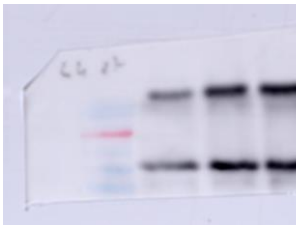

◀ Actin

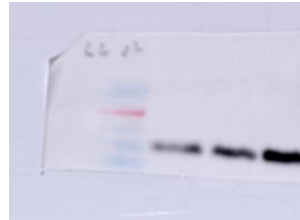

# Pam16

(The running order is H.C / P1 / P2)

Pam16 ▶

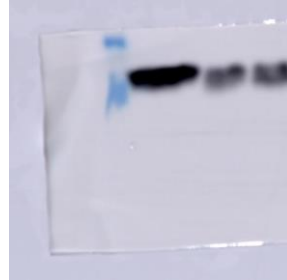

◀ Actin

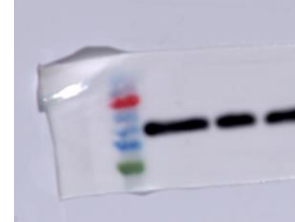

Pam16 ▶

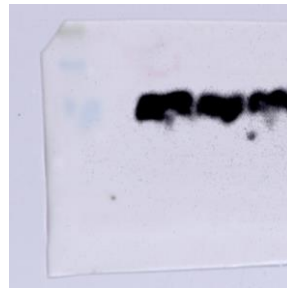

◀ Actin

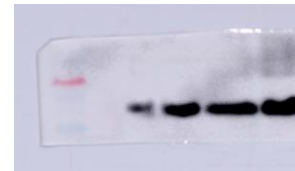

Pam16 ▶

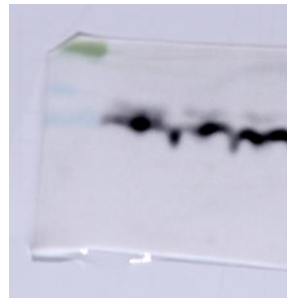

◀ Actin

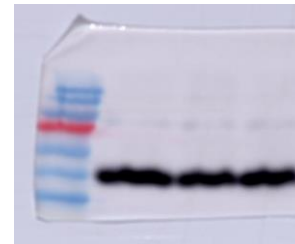

# TOMM40

(The running order is H.C / P1 / P2)

TOMM40 ►

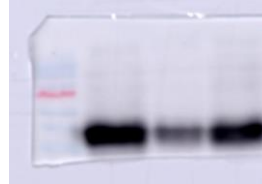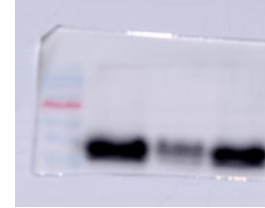

◄ Actin

TOMM40 ►

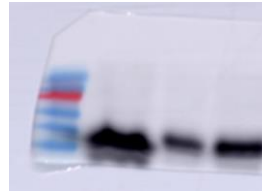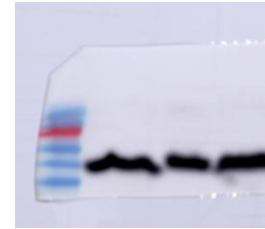

◄ Actin

TOMM40 ►

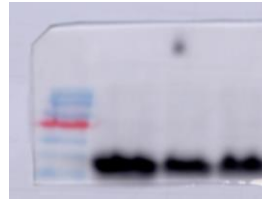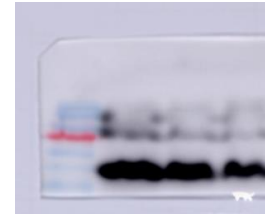

◄ Actin



# TOMM20

(The running order is H.C / P1 / P2)

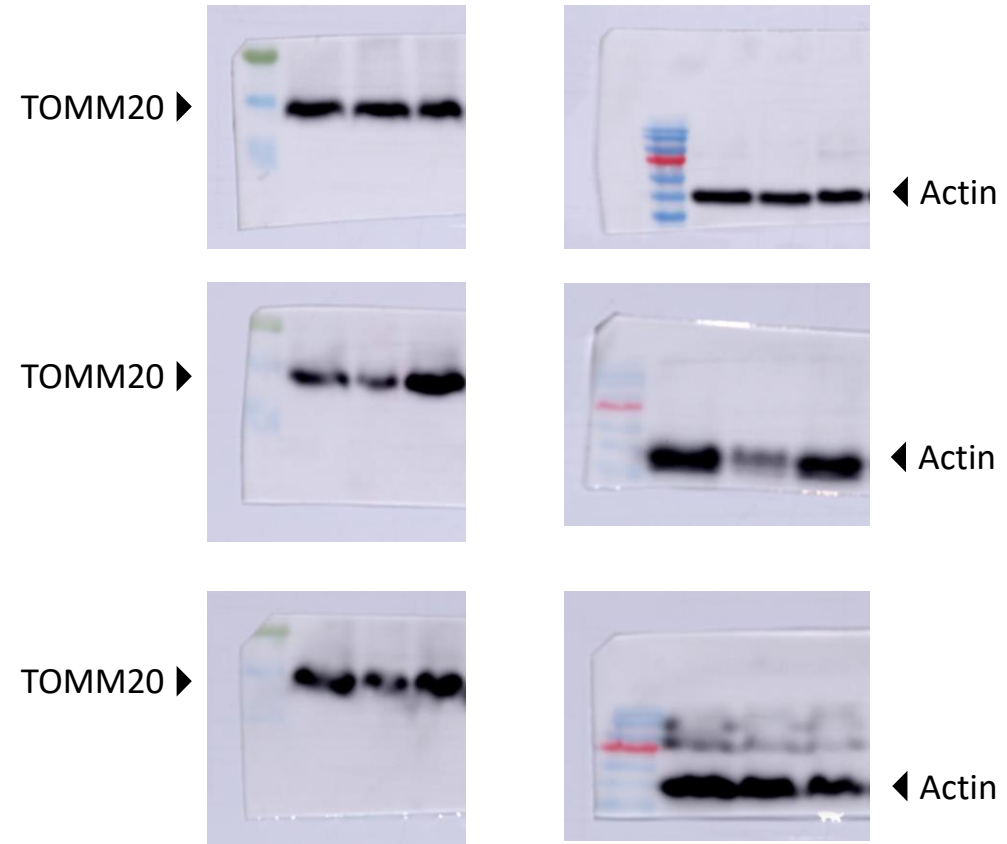

# mtHsp60

(The running order is H.C / P1 / P2)

mtHsp60 ▶

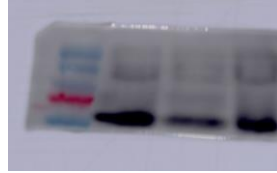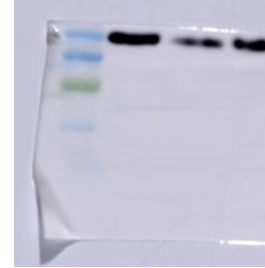

◀ Actin

mtHsp60 ▶

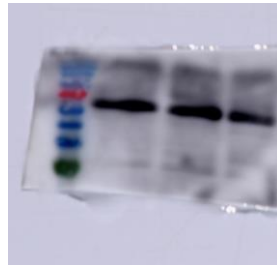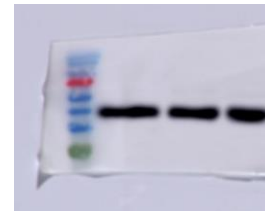

◀ Actin

mtHsp60 ▶

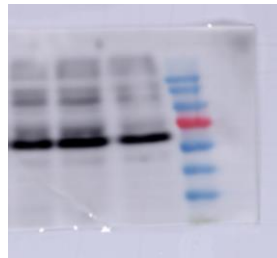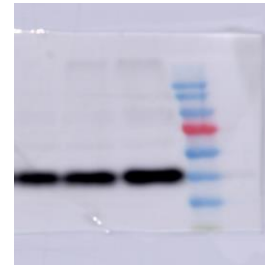

◀ Actin

## Aconitase-2

(The running order is H.C / P1 / P2)

Aconitase-2 ▶  
mtHsp60 ▶

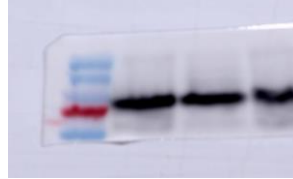

◀ Actin

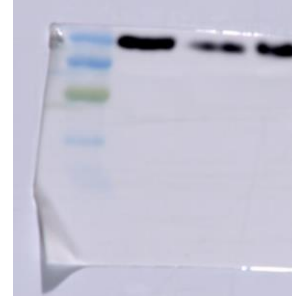

Aconitase-2 ▶

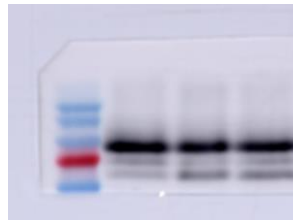

◀ Actin

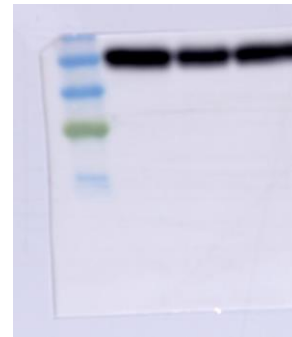

Aconitase-2 ▶

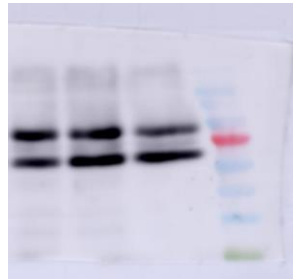

◀ Actin

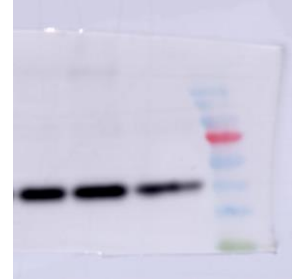

Supplement: fig1-data1 [file elife-99914-fig1-data1-v1.zip]
