# Supplementary material for: Biochemical and neurophysiological effects of deficiency of the mitochondrial import protein TIMM50
Source: eLife journal article supplement (doi:10.7554/elife.99914), 2024-08-29

(Running order is Untreated / pLL3.7 control / Scr control / Sh1 / Sh2 / Sh3)

(Running order is Untreated / pLL3.7 control / Scr control / Sh1 / Sh2 / Sh3)

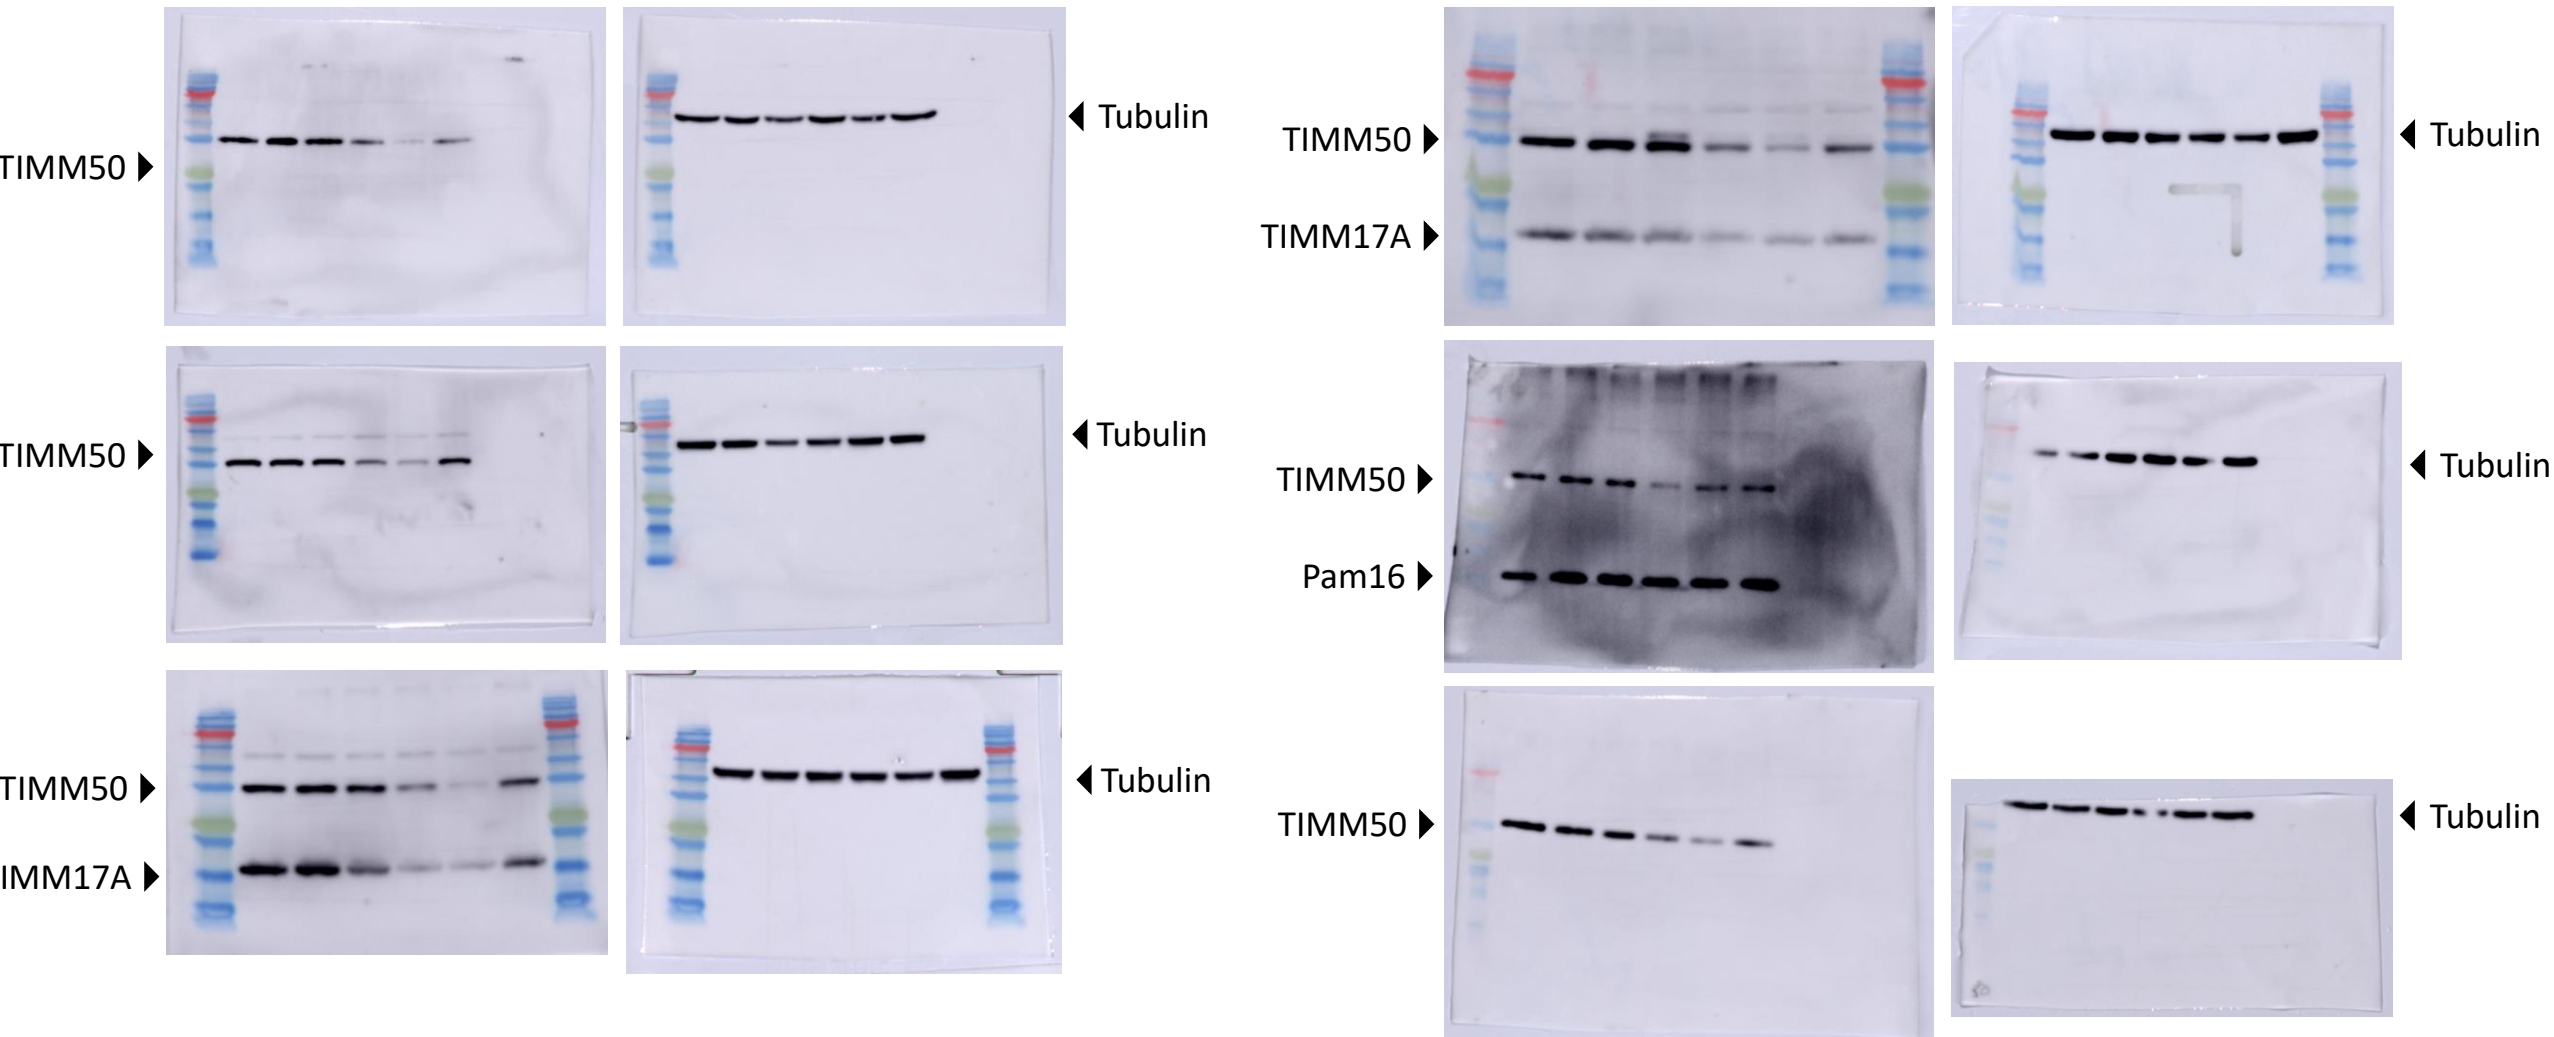

# TIMM50

(Running order is Untreated / pLL3.7 control / Scr control / Sh1 / Sh2 / Sh3)

\*The bottom blot has only Scr control and Sh2 samples from 4 separate cultures and a different running order than the rest

TIMM50 ►

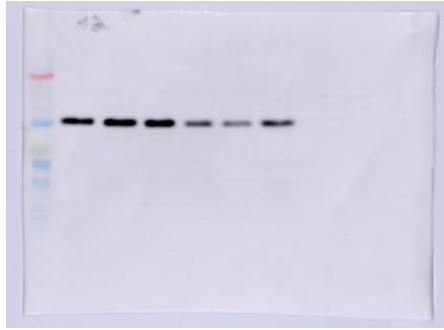

◄ Tubulin

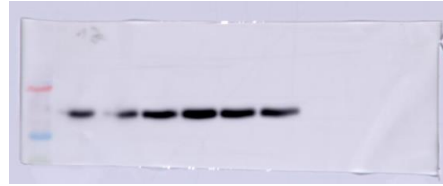

TIMM50 ►

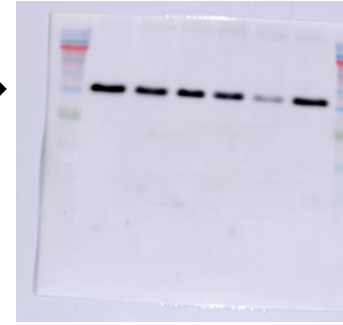

◄ Tubulin

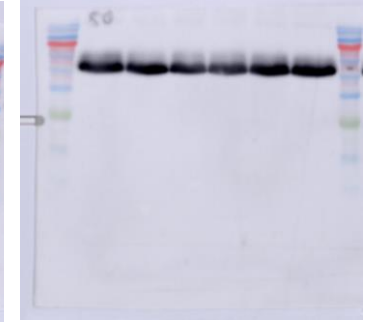

TIMM50 ►

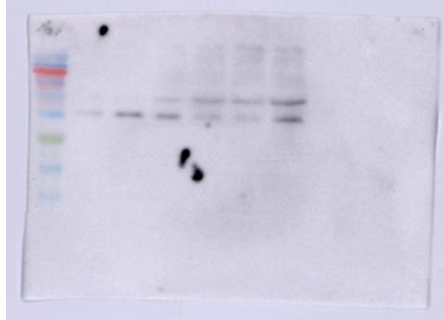

◄ Tubulin

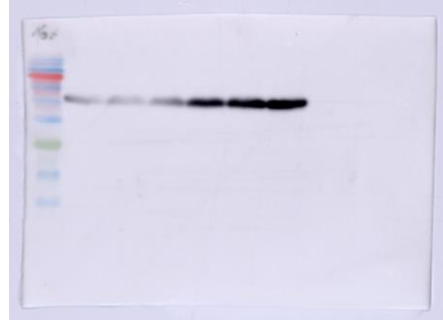

TIMM50 ►

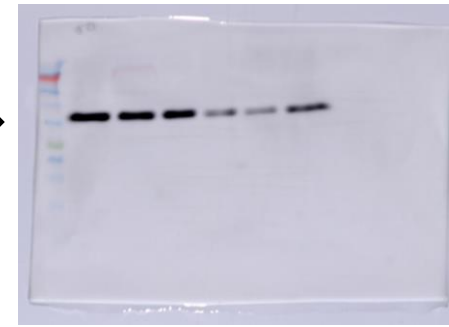

◄ Tubulin

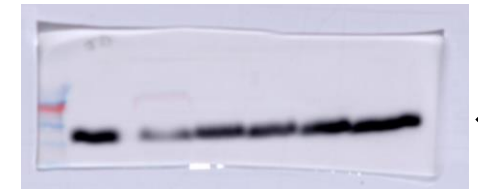

TIMM50 ►

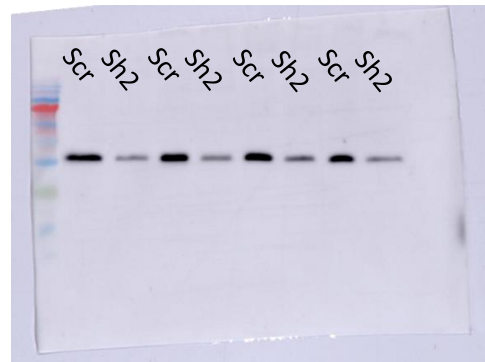

◄ Tubulin

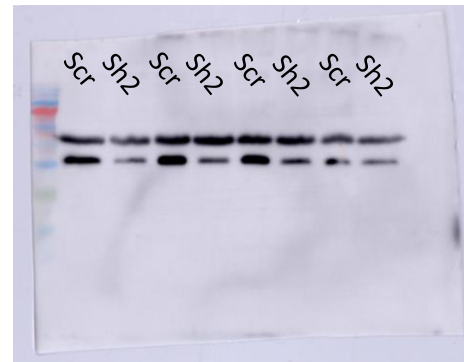

# TIMM23

(Running order is Untreated / pLL3.7 control / Scr control / Sh1 / Sh2 / Sh3)

TIMM23 ►

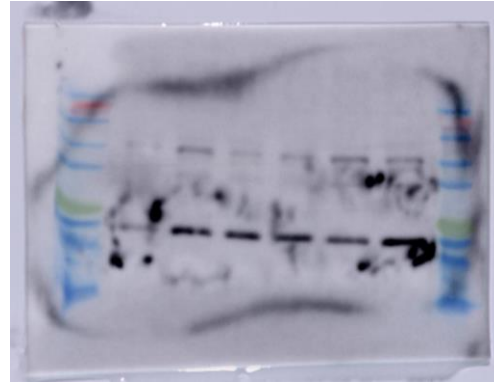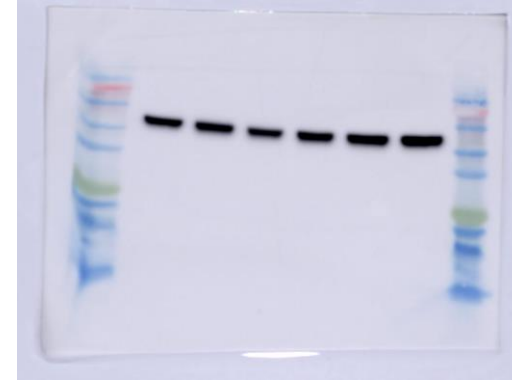

◄ Tubulin

TIMM23 ►

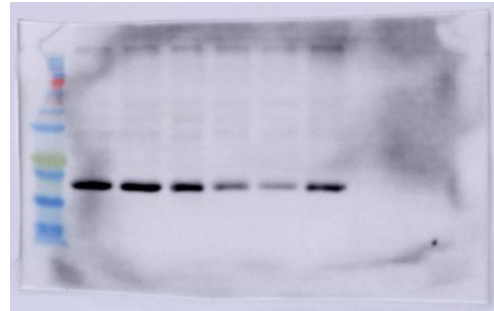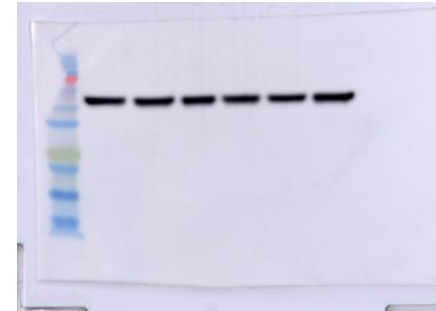

◄ Tubulin

TIMM23 ►

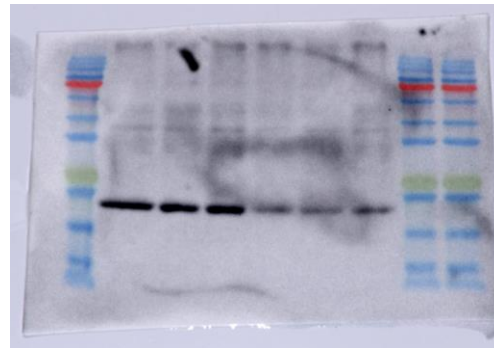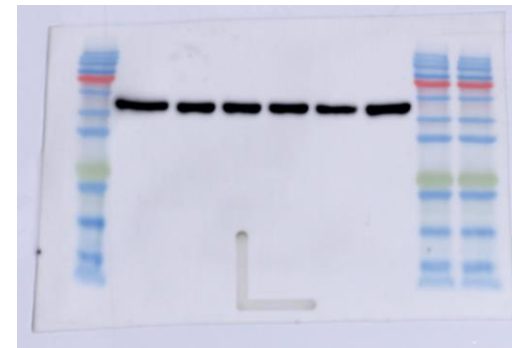

◄ Tubulin

# TIMM17A

(Running order is Untreated / pLL3.7 control / Scr control / Sh1 / Sh2 / Sh3)

\*Note that the blot on the right had a different running order

TIMM50 ▶  
TIMM17A ▶

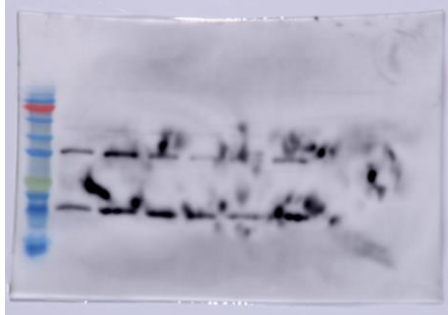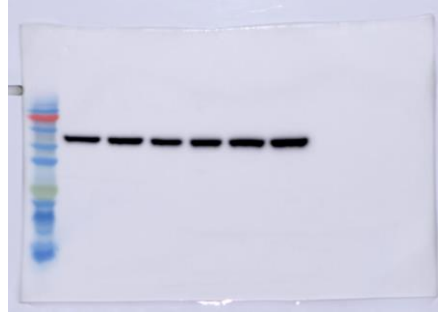

◀ Tubulin

TIMM50 ▶  
TIMM17A ▶

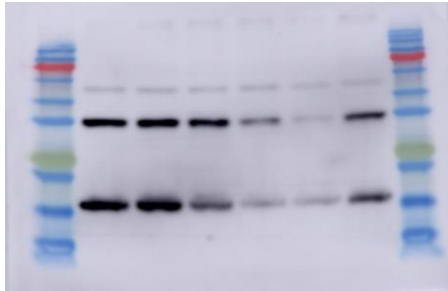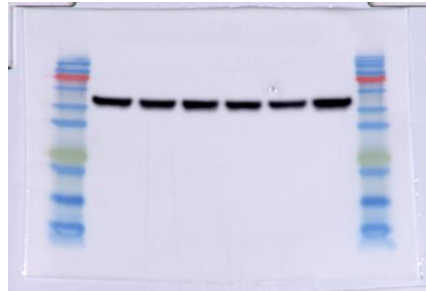

◀ Tubulin

TIMM17A ▶

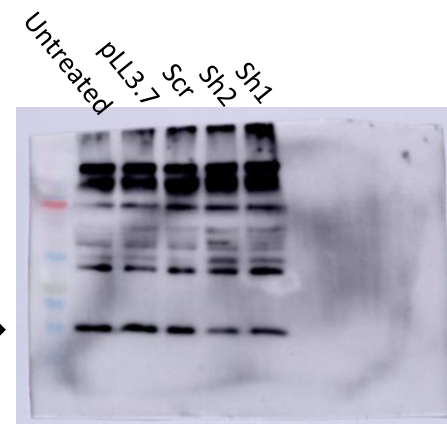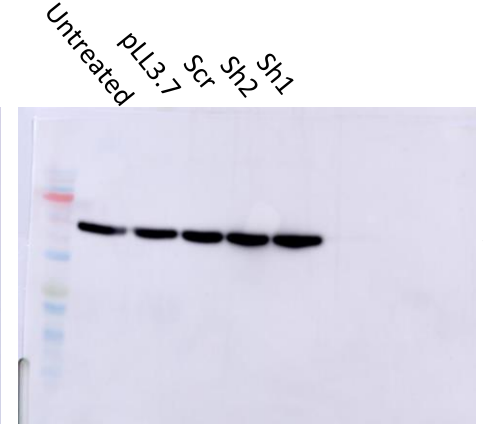

◀ Tubulin

TIMM50 ▶  
TIMM17A ▶

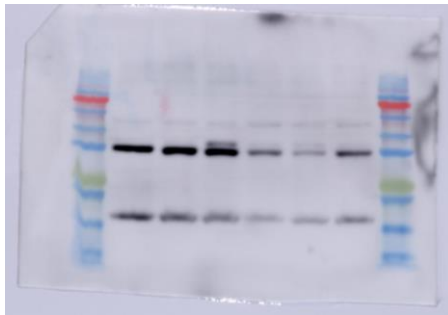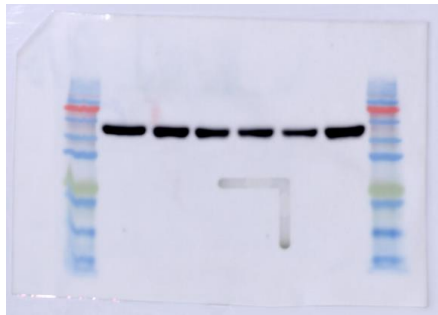

◀ Tubulin

# TIMM17B

(Running order is Untreated / pLL3.7 control / Scr control / Sh1 / Sh2 / Sh3)

TIMM17B ▶

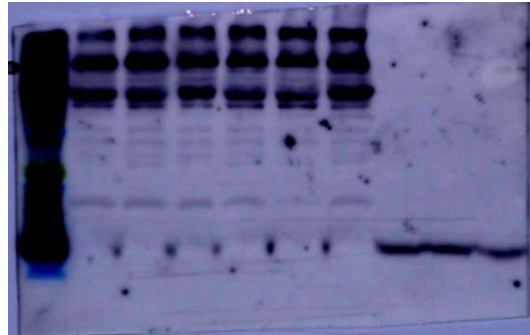

TIMM17B ▶  
(Upper part of the  
membrane was used  
for Timm21)

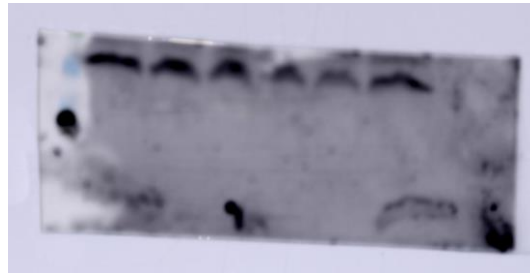

TIMM17B ▶

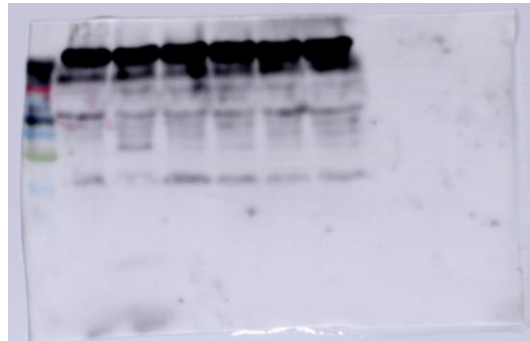

◀ Tubulin

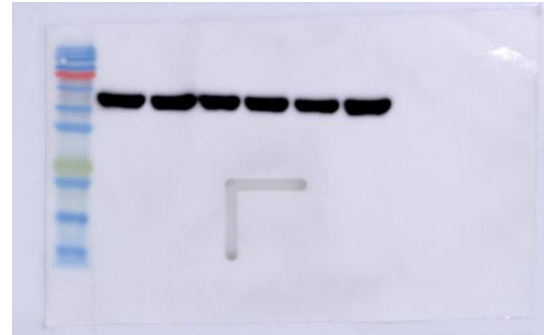

◀ Tubulin

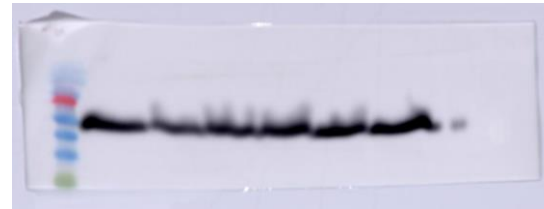

◀ Tubulin

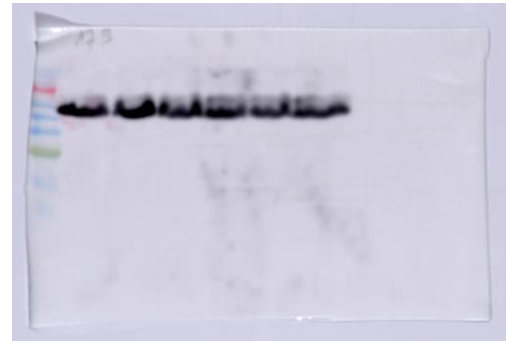

# TIMM21

(Running order is Untreated / pLL3.7 control / Scr control / Sh1 / Sh2 / Sh3)

TIMM21 ▶

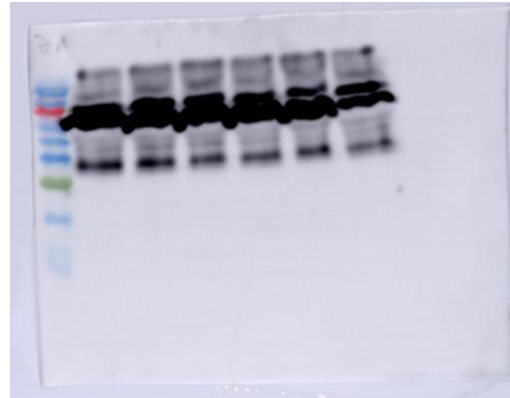

◀ Tubulin

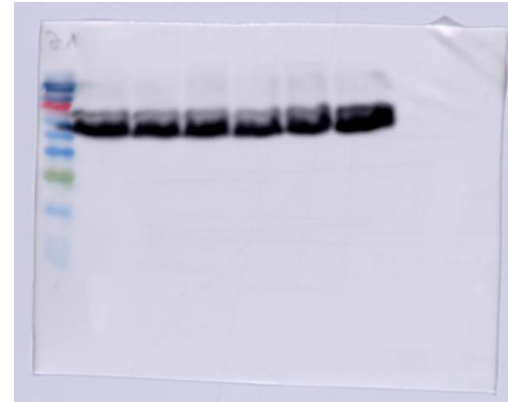

TIMM21 ▶

(Bottom part of the  
membrane was used  
for TIMM17B)

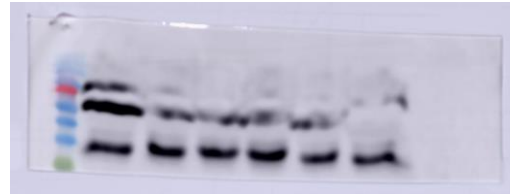

◀ Tubulin

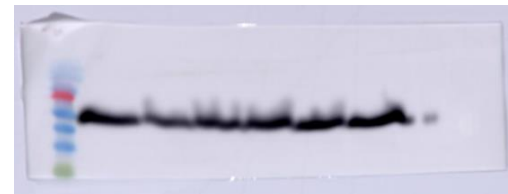

TIMM21 ▶

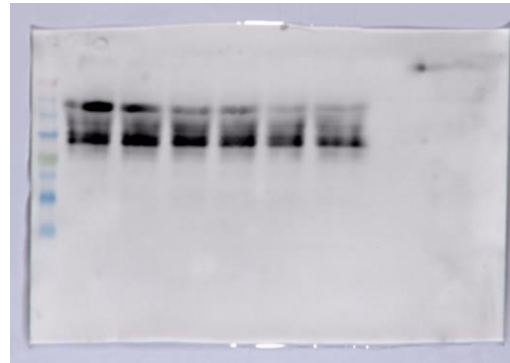

◀ Tubulin

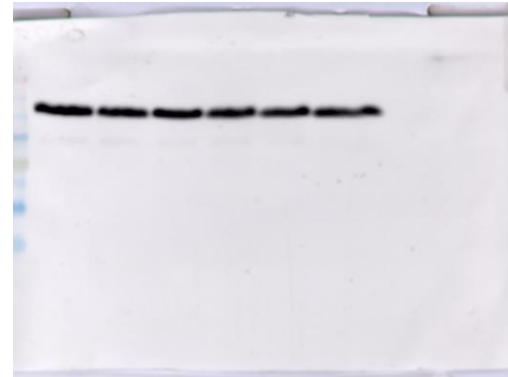

# TIMM44

(Running order is Untreated / pLL3.7 control / Scr control / Sh1 / Sh2 / Sh3)

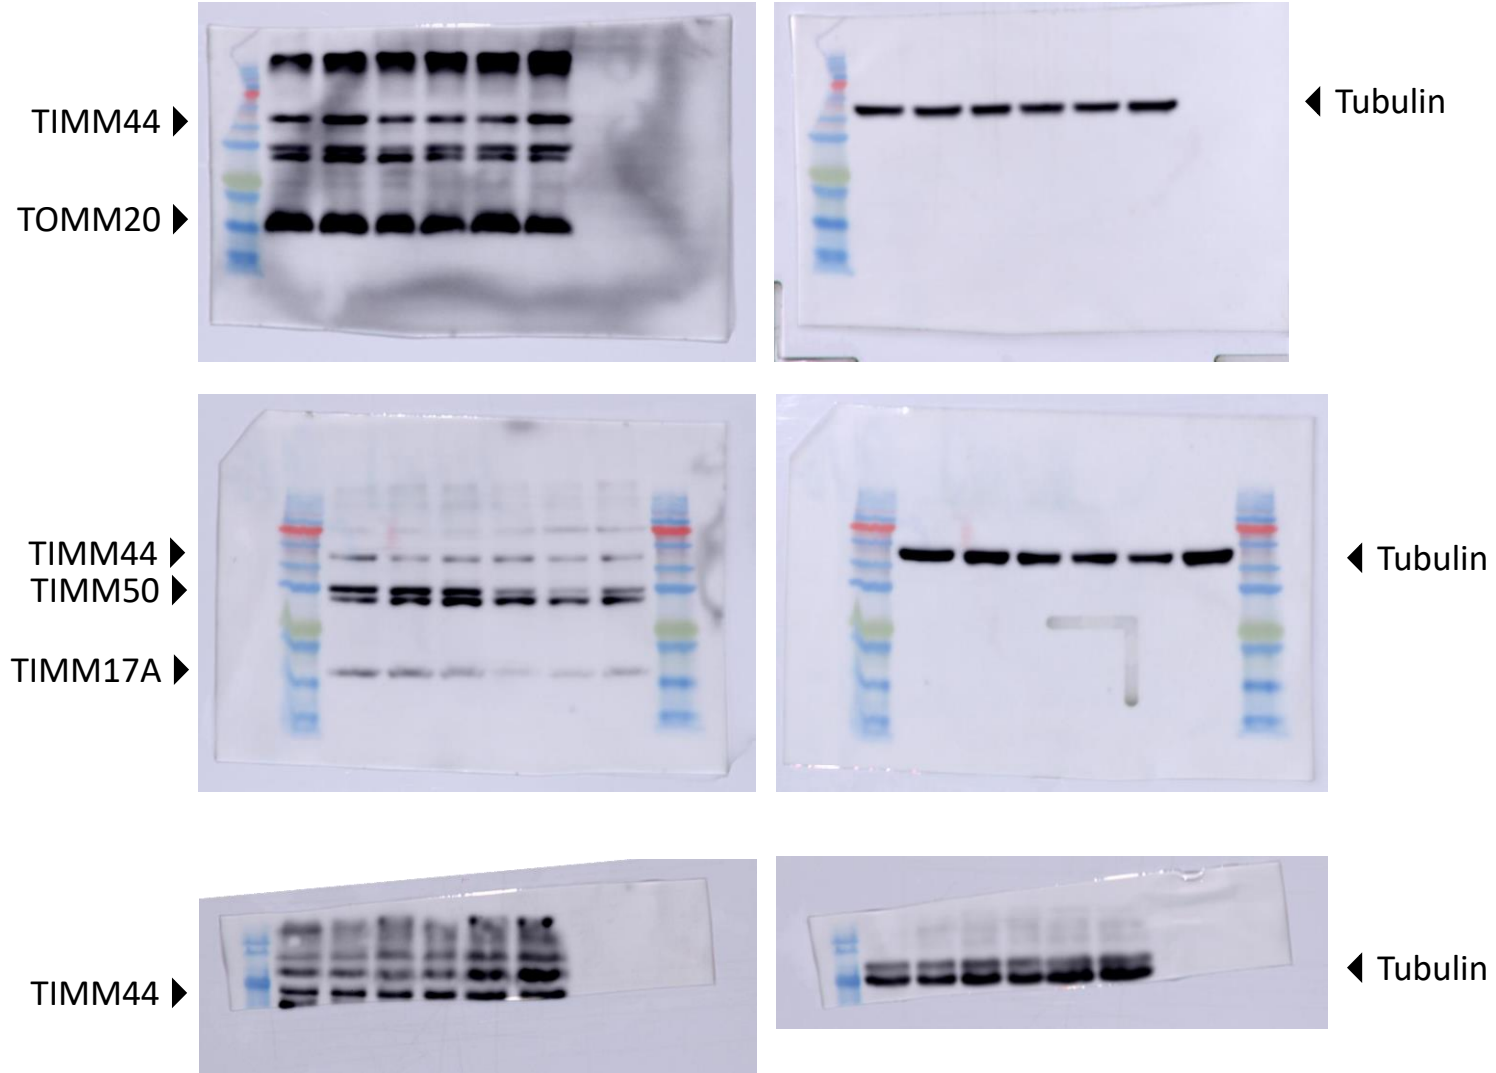



## Pam16

(Running order is Untreated / pLL3.7 control / Scr control / Sh1 / Sh2 / Sh3)

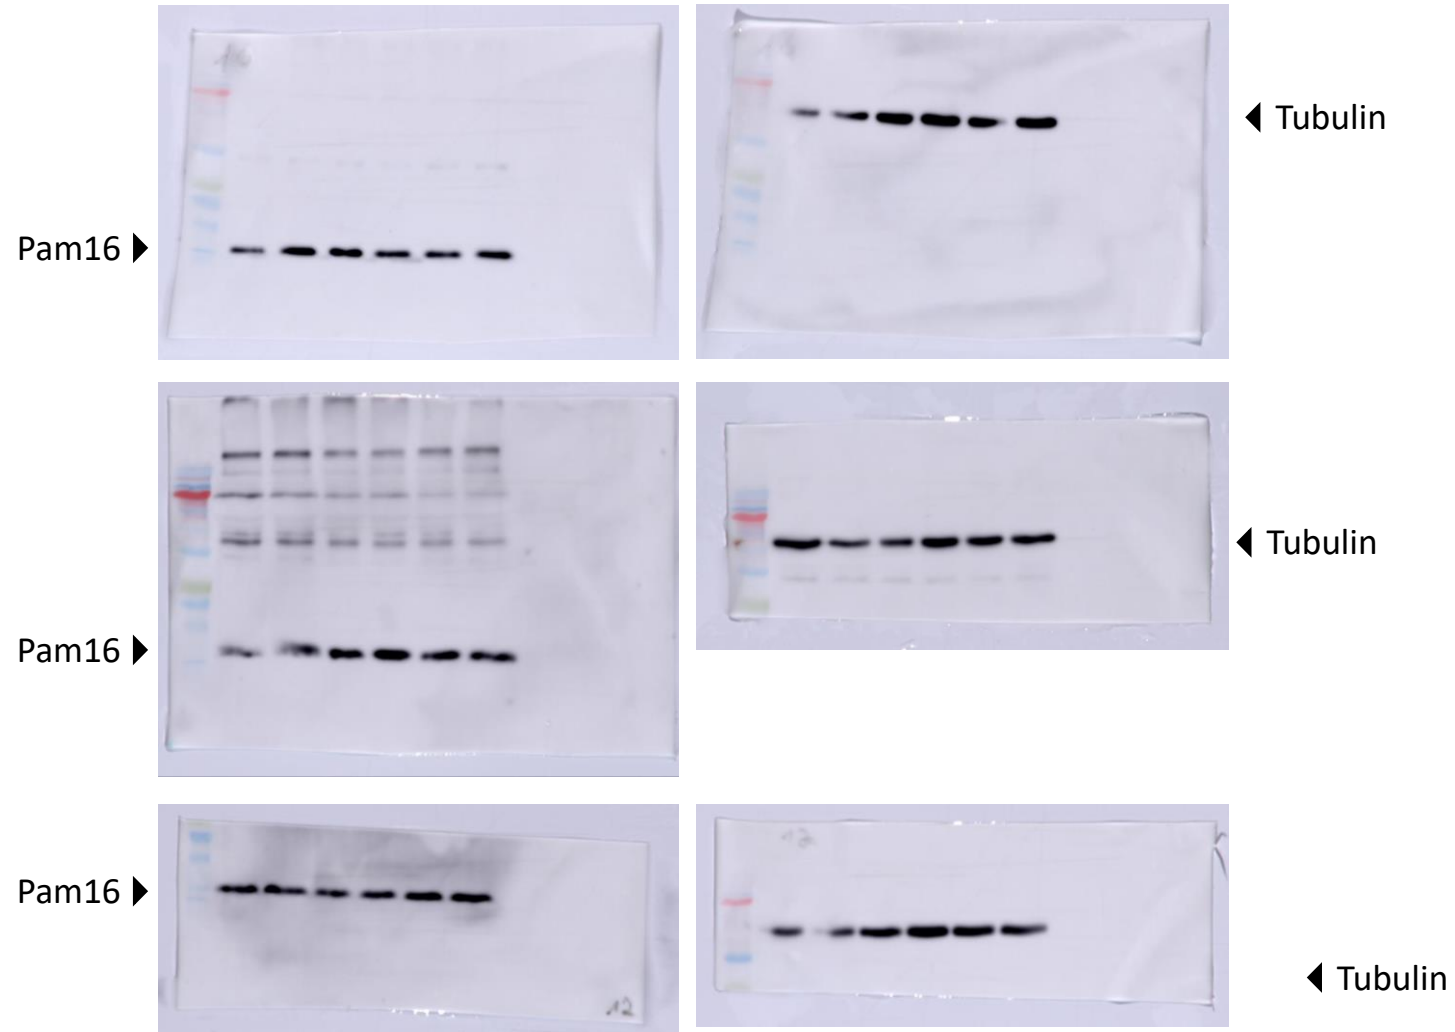



# TOMM40

(Running order is Untreated / pLL3.7 control / Scr control / Sh1 / Sh2 / Sh3)

TOMM40 ►

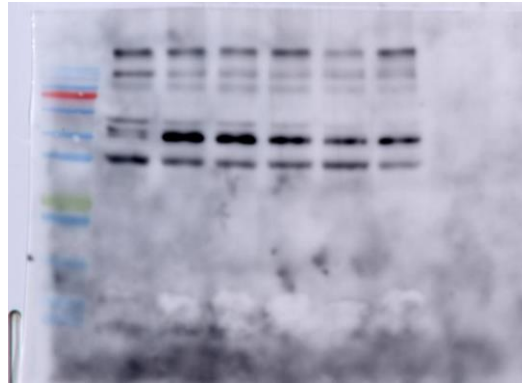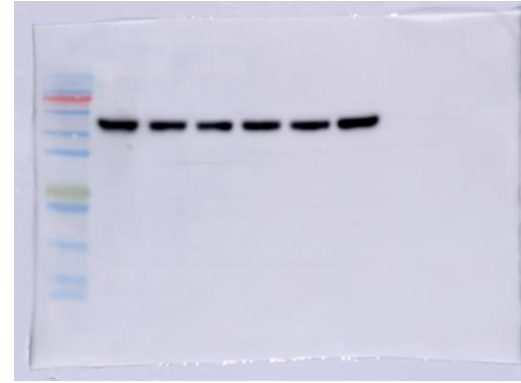

◄ Tubulin

TOMM40 ►

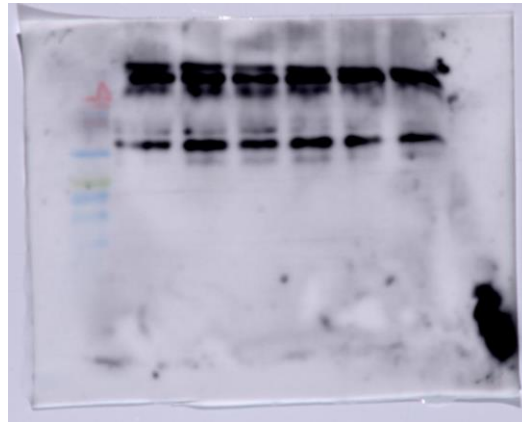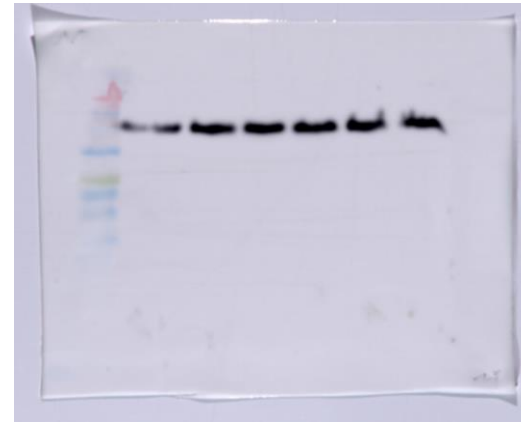

◄ Tubulin

TOMM40 ►

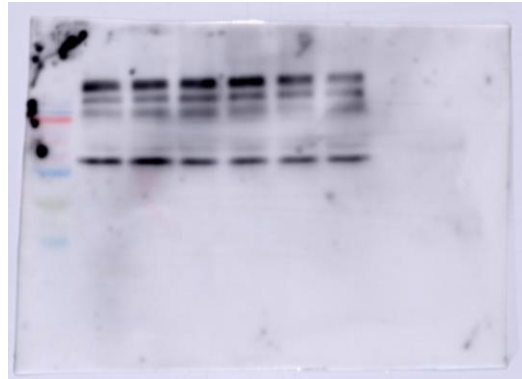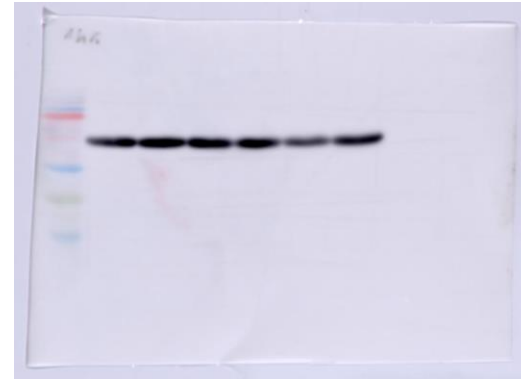

◄ Tubulin

# TOMM20

(Running order is Untreated / pLL3.7 control / Scr control / Sh1 / Sh2 / Sh3)

TOMM20 ►

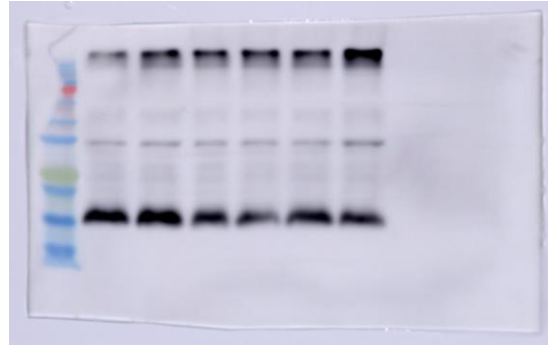

◄ Tubulin

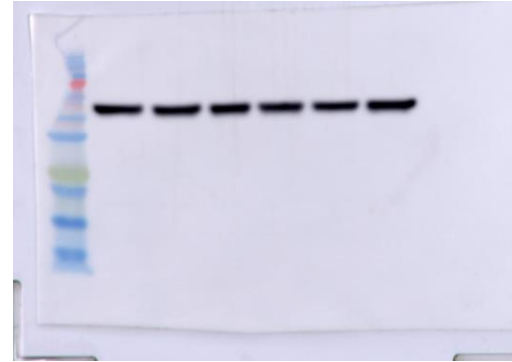

TOMM20 ►

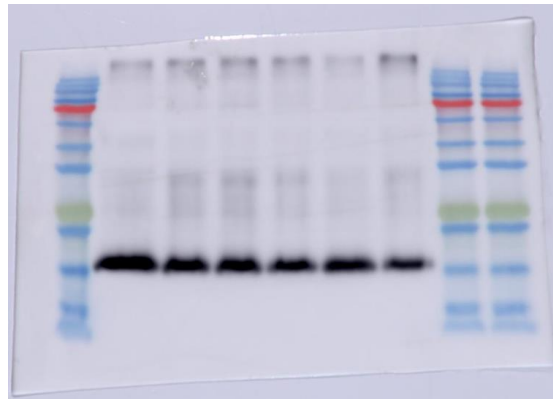

◄ Tubulin

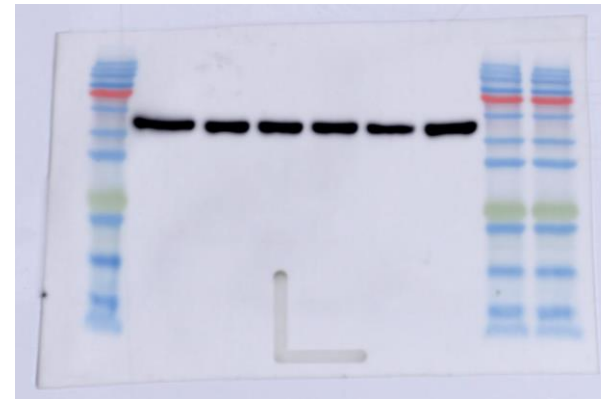

TOMM20 ►

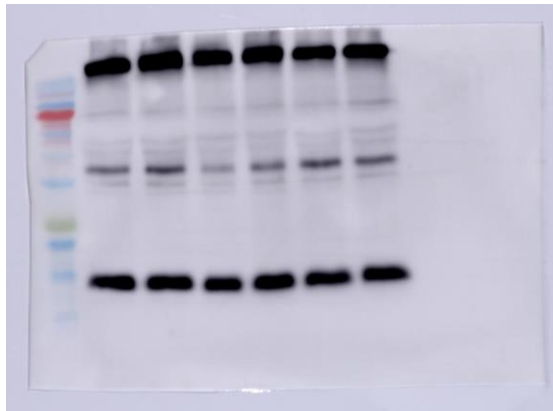

◄ Tubulin

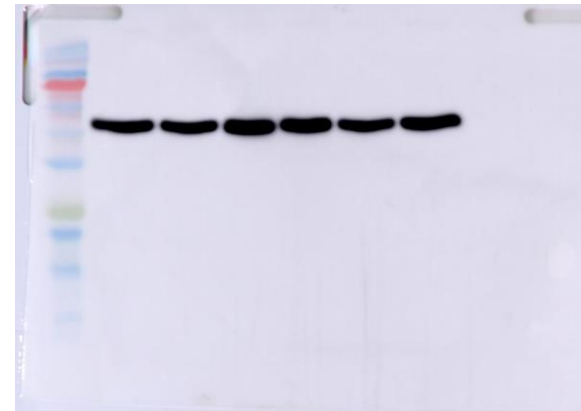

## mtHsp60

(Running order is Untreated / pLL3.7 control / Scr control / Sh1 / Sh2 / Sh3)

mtHsp60 ►

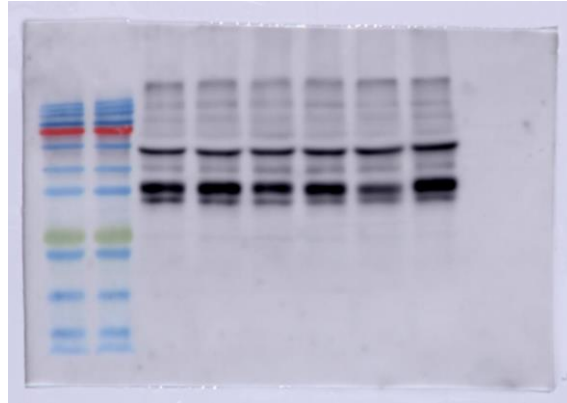

◄ Tubulin

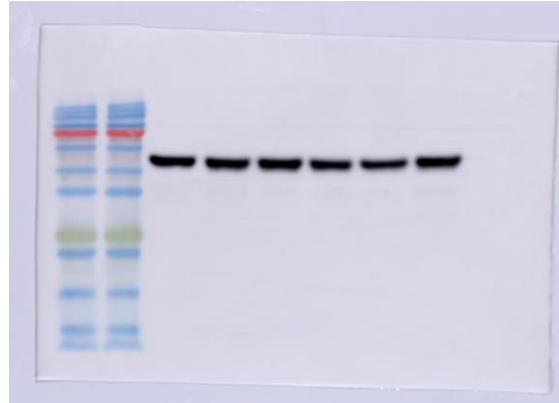

Aconitase-2 ►  
mtHsp60 ►

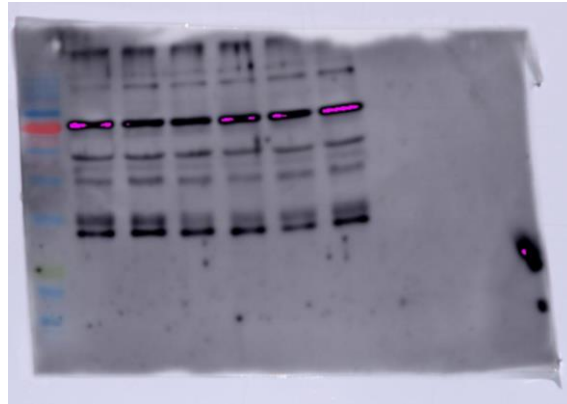

◄ Tubulin

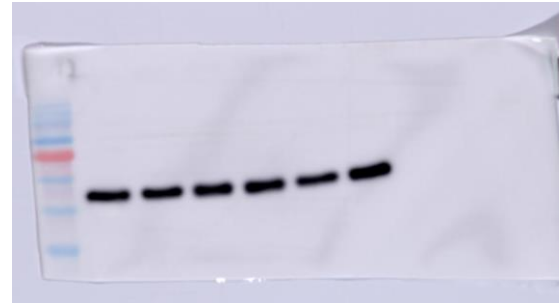

mtHsp60 ►

(Same membrane was used for Pam16 so the bottom was removed)

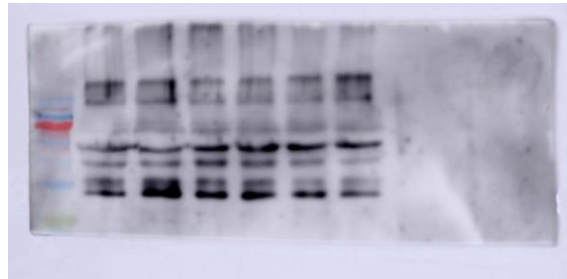

◄ Tubulin

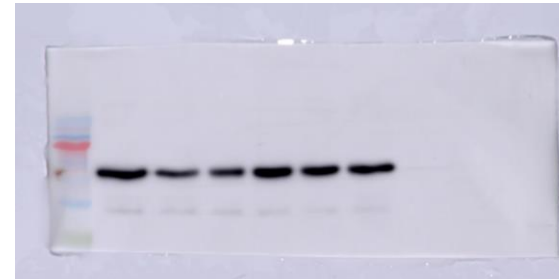

## Aconitase-2

(Running order is Untreated / pLL3.7 control / Scr control / Sh1 / Sh2 / Sh3)

Aconitase-2 ▶

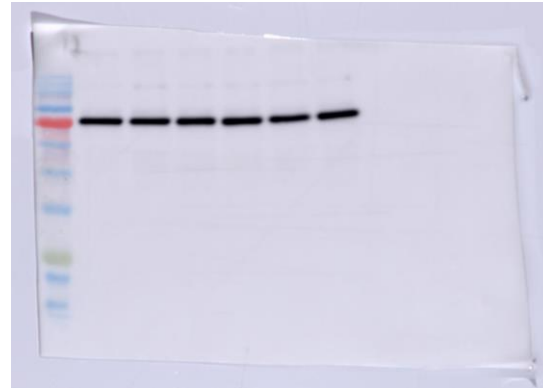

◀ Tubulin

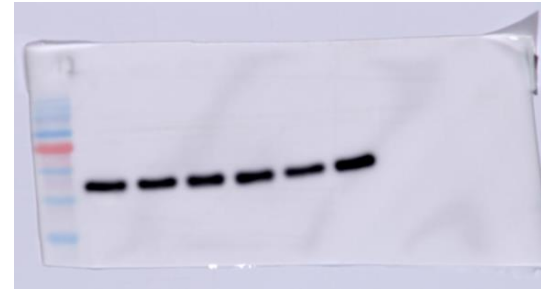

Aconitase-2 ▶

TIMM50 ▶

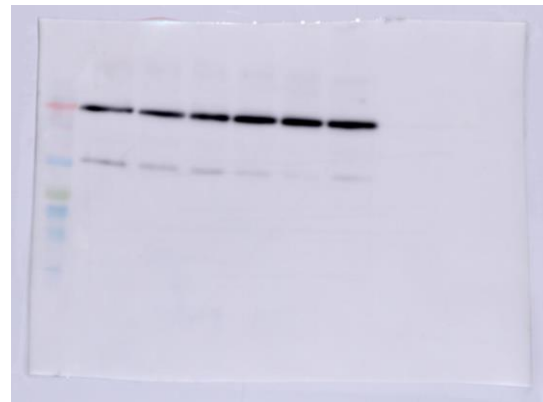

◀ Tubulin

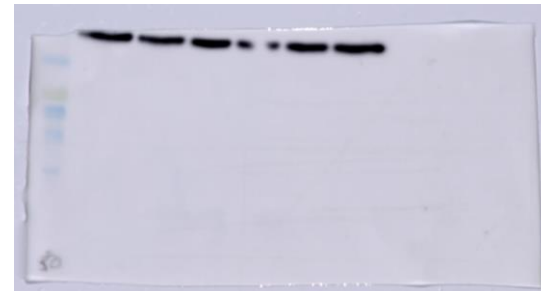

Aconitase-2 ▶

TIMM50 ▶

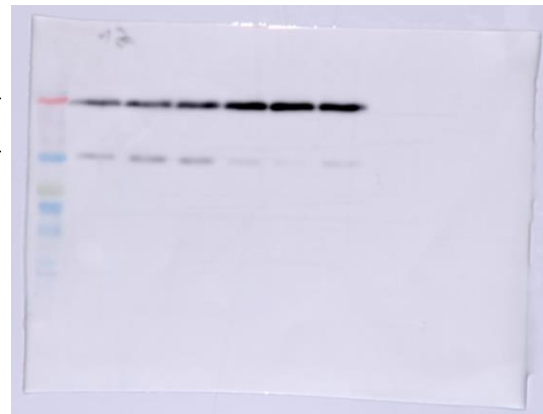

◀ Tubulin

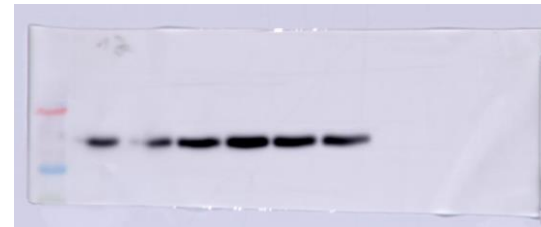

Supplement: fig2-data1 [file elife-99914-fig2-data1-v1.zip]
