# Supplementary material for: Biochemical and neurophysiological effects of deficiency of the mitochondrial import protein TIMM50
Source: eLife journal article supplement (doi:10.7554/elife.99914), 2024-08-29

# KCNA2

(Running order is Untreated / pLL3.7 control / Scr control / Sh1 / Sh2 / Sh3)

KCNA2 ▶

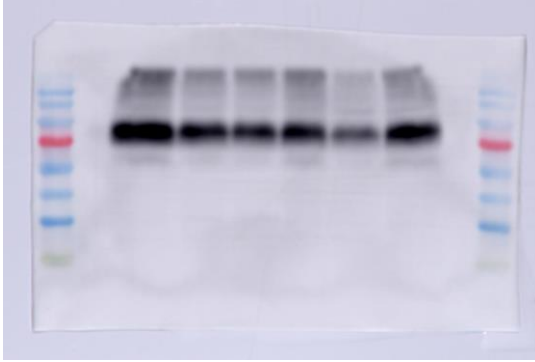

TIMM50 ▶

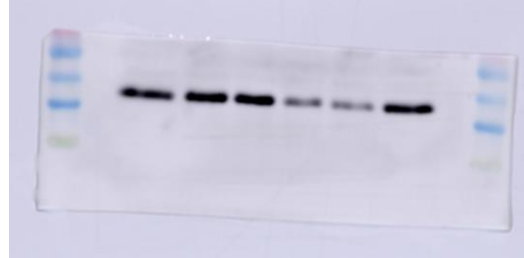

Tubulin ▶

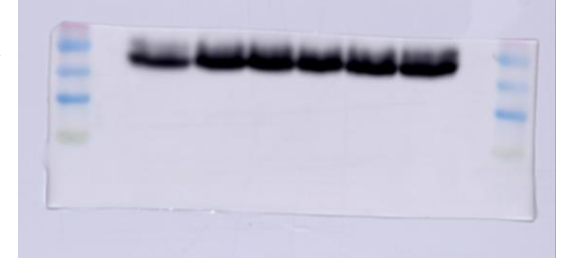

KCNA2 ▶

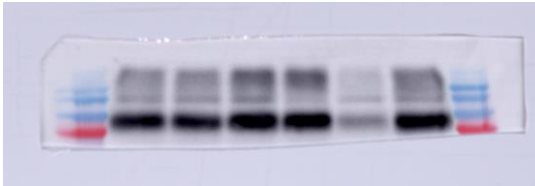

TIMM50 ▶

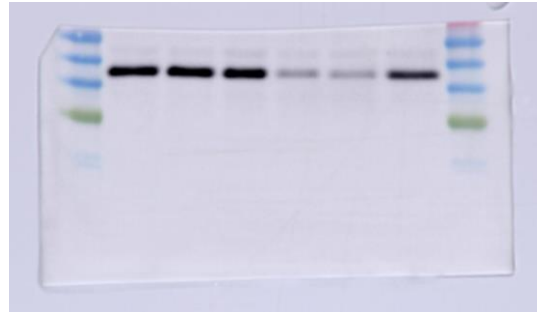

Tubulin ▶

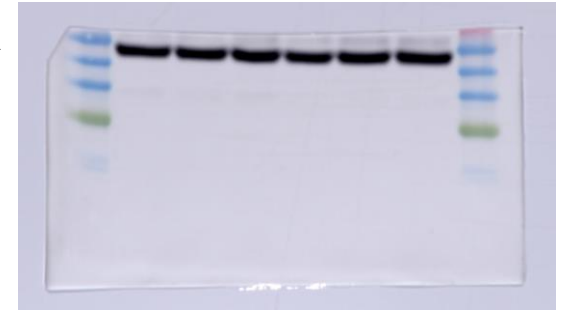

KCNA2 ▶

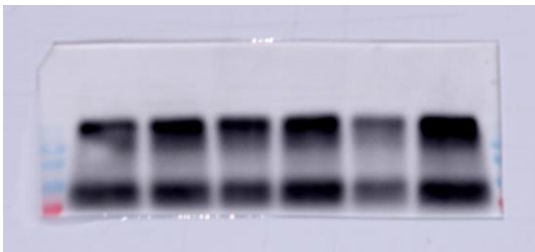

TIMM50 ▶

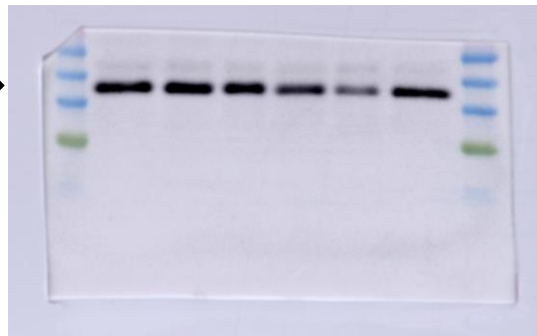

Tubulin ▶

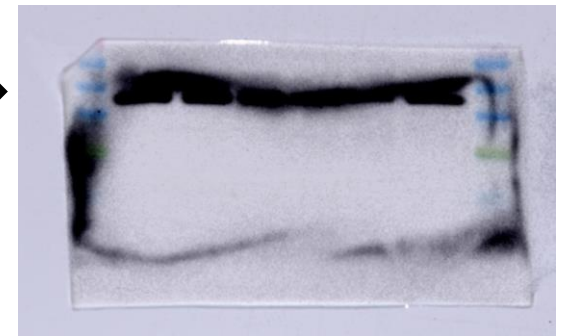

Supplement: fig7-figsupp2-data1 [file elife-99914-fig7-figsupp2-data1-v1.zip]
