# Supplementary figures and images for: Biochemical and neurophysiological effects of deficiency of the mitochondrial import protein TIMM50
Source: eLife journal article supplement (doi:10.7554/elife.99914), 2024-08-29

# ALDH2

(The running order is H.C / P1 / P2)

ALDH2 ▶

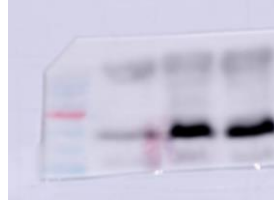

◀ GAPDH

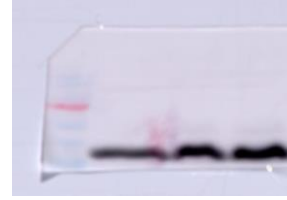

ALDH2 ▶

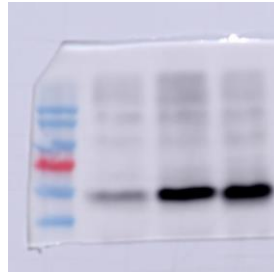

◀ Actin

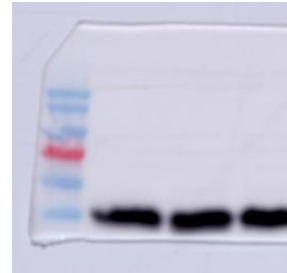

ALDH2 ▶

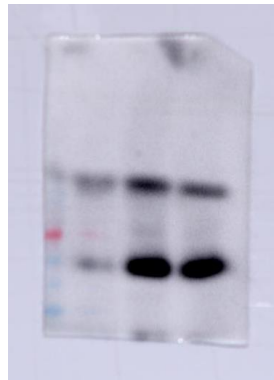

◀ Actin

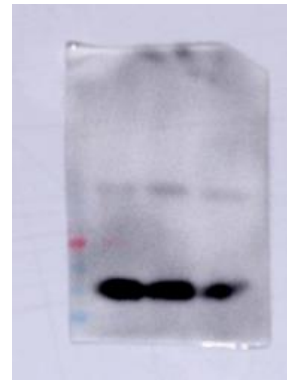

# GRSF1

(The running order is H.C / P1 / P2)

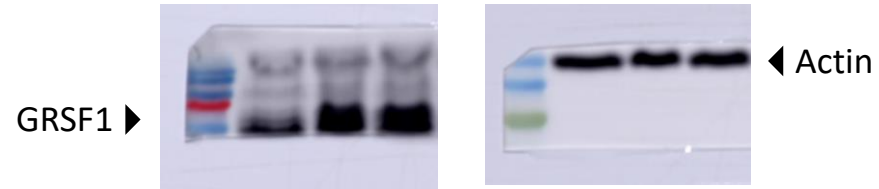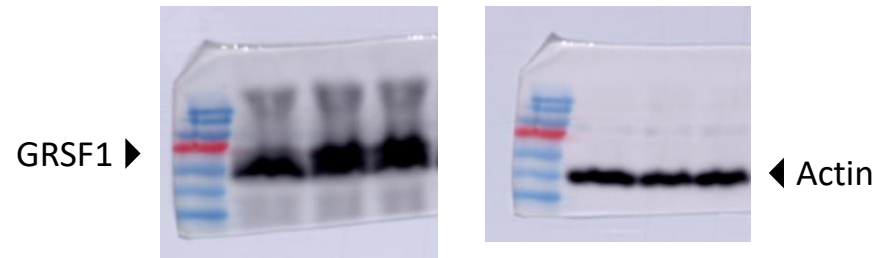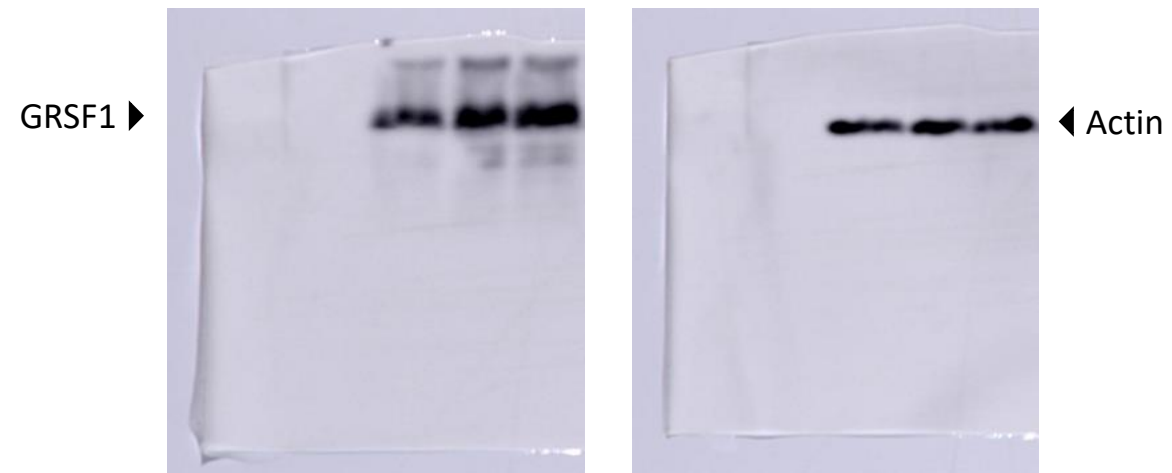

Supplement: fig3-figsupp2-data1 [file elife-99914-fig3-figsupp2-data1-v1.zip]

# OXA1

(The running order is H.C / P1 / P2)

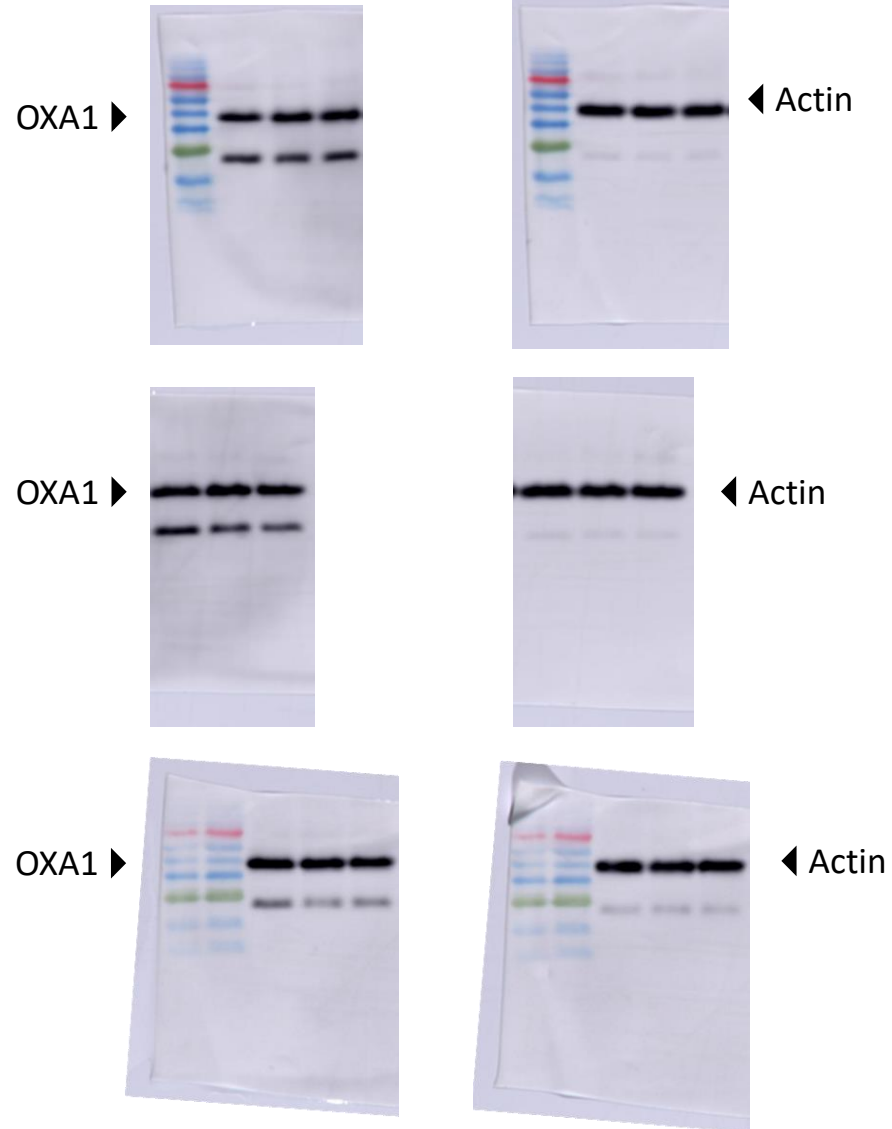

Supplement: fig3-figsupp3-data1 [file elife-99914-fig3-figsupp3-data1-v1.zip]
